# Supplementary material for: New insights into Early Celtic consumption practices: Organic residue analyses of local and imported pottery from Vix-Mont Lassois
Source: PLoS One. 2019 Jun 19;14(6):e0218001. doi: 10.1371/journal.pone.0218001 (PMC6583963; doi:10.1371/journal.pone.0218001)
Supplement: S3 Table — List of samples including the analytical results and their interpretation arranged according to context. (XLSX) [file pone.0218001.s006.xlsx]

## Sheet: T3_Rampart_ChampFossé
Archaeological context		Vessel technology	Generic typology	Inventory / object number	Laboratory number	Quantities of lipid biomarkers (excluding fruit carboxylic acids) recovered from the sherds (µg/g)	Fatty acids	Plant by-products							Animal by-products					Substances
								Plant fatty acids	Plant triacylglycerides and sterols	Plant wax esters (acid–alcohol), n-alcohols (A) and -alkanes (a)	Plant terpenoids		Bacterio-hopanes	Fruit carboxylic acids	Animal triacylglycerides	Animal δ13C and Δ13 signatures			Beeswax esters (acid–alcohol), n-alcohols (A) and -alkanes (a)
											Cereals	Higher plants				C16:0	C18:0	Offset
Rampart area, Champ Fossé, phase V, after reinforcement of rampart	Sector A, Fait 017-002	Handmade, fine ceramic	low/medium form (bowl?, 32000?)	A-017-002-001	VIX-CF-004	1691	C16:0	_	_	_	Miliacin	_	_	_	_	_	_	_	W40 (16-24); W42 (16-26); W44 (16-28); W46 (16-30); W48 (16-32); A22; A24; A26; A28; A30; A32; a23; a25; a27; a29; a31	Millet; beeswax
	Sector B, Fait 017-004		low/medium form (beaker?, 32100)	B-017-004-019	VIX-CF-006	231	C16:0; C18:0	_	_	W34(16-18); W40(16-24)tr?; A16; A18; A20; A22; A24; A26; A28; A30; a23; a25; a27; a29	_	_	C29; C30	_	_	_	_	_	_	Plantwax; bacterian fermentation product
	Sector B, Fait 017-004		low form (bowl, 22200?)	B-017-004-019	VIX-CF-018	1309	C16:0;C18:1; C18:0; C20:0; C22:0; C24:0	_	_	W42(20-22); W44(20-24); A16; A18; A22; A24	_	_	_	_	_	_	_	_	W40 (16-24); W42 (16-26); W44 (16-28)tr; W46 (16-30)tr; A22; A24; A26; A28; A30; A32; a23; a25; a27; a29; a31	Plantwax; beeswax?
	Sector A, Fait 017-001	Handmade, semi-fine to coarse ceramic	high form (bottle/jar, 74000)	A-017-001-009	VIX-CF-003	2684	C16:0; C17:0; C18:1; C18:0; C20:0; C22:0; C24:0; C26:0; C28:0	C16/C18 ≥ 11; C18:1≥C18:0	_	A16; A18; A20	_	Lupa-2,20(29)-diene, α-betuline I, lupa-2,20(29)-dien-28-ol, allobetul-2-ene, lupenone, lupeol, erythrodiol, betulone, betuline, betulinic acid, allobetuline, betulinic acid 3-acetate	_	_	_	_	_	_	W40 (16-24); W42 (16-26); W44 (16-28); W46 (16-30); W48 (16-32); A22; A24; A26; A28; A30; A32; A34; a21; a23; a25; a27; a29; a31	Possibly plant oil; beeswax; birch bark tar
	Sector A, Fait 017-002		high form (bottle/jar, 70000)	A-017-002-001	VIX-CF-001	< 5	_	_	_	_	_	_	_	_	_	_	_	_	_	_
	Sector B, Fait 017-004	Handmade, semi-fine to coarse ceramic	low/medium form (cooking pot /bowl?, 25200/53000?)	B-017-004-009	VIX-CF-005	5022	C16:0; C18:0	_	_	W32 (14-18); W34 (16-18); W36 (18-18); W36 (16-20)	_	_	C29; C30; C32	Succinic; fumaric; malic and tartaric (tr) acids	52; 50; 48; 46?	-27.012	-26.7075	0.3045	_	Animal fat (porcine / wild porcine); plantwax; bacterian fermentation product; grape product/wine?
	Sector A, Fait 017-002	Handmade, coarse ceramic	low/medium form (cooking pot / bowl?, 34200)	A-017-002-001	VIX-CF-002	729	C16:0; C18:0; C24:0tr	_	_	W50 (18-32); W52(22-30); W54 (22-32); W56 (22-34)	_	_	_	_	_	_	_	_	W38 (16-22); W40 (16-24); W42 (16-26); W44 (16-28); W46 (16-30); W48 (16-32); W50 (16-34); A22; A24; A26; A28; A30; A32; A34; a21; a23; a25; a27; a29; a31	Plantwax; beeswax
Rampart area, Champ Fossé, undetermined phase, replenishment of rampart: before/during reinforcement of rampart	Sector C, Fait 041-001 (Layer 41,1)	Handmade, fine ceramic	low/medium form (bowl, 34400)	C-041-001-003	VIX-CF-013	1588	C16:0; C18:1; C18;0; C24:0; C26:0; C28:0	_	_	W42(20-22); W44(20-24); W46 (20-26); A18; A20; A22	_	_	_	_	_	_	_	_	W40 (16-24); W42 (16-26); W44 (16-28); W46 (16-30); W48 (16-32); A22; A24; A26; A28; A30; A32; a21; a23; a25; a27; a29; a31	Plantwax; beeswax
	Sector C, Fait 041-001 (Layer 41,1)		low form (bowl, 21100)	C-041-001-002	VIX-CF-015	6946	C16:0; C18;0	_	_	W32 (14-18); W42 (18:0-24); W44 (18:0-26); W46 (18:0-28); W48 (18:0-30) W50 (18:0-32)	Miliacin	_	C30; C32	Succinic; fumaric; malic and tartaric (tr) acids	_	-27.9465	-31.1137	-3.16725	W38 (16-22); W40 (16-24); W42 (16-26); W44 (16-28); W46 (16-30); W48 (16-32); W50 (16-34); W42 (18:1-24); W44 (18:1-26); W46 (18:1-28); W48 (18:1-30); W50 (18:1-32); A24; A26; A28; A30; A32; A34; a25; a27; a29; a31	Animal fat (dairy); millet; plantwax; beeswax; grape product/wine?; bacterian fermentation product
	Sector C, Fait 041-001 (Layer 41,1)		low form (bowl, 21100)	C-041-001-005	VIX-CF-014	275	C16:0; C18:1; C18:0; C24:0tr	C16/C18 ≥ 1,5; 18:1 high	_	A16; A18; A20	_	_	_	_	_	_	_	_	_	Fat (plant oil?)
	Sector C, Fait 041-001 (Layer 41,1)		low/medium form (bowl, 34200)	C-041-001-004	VIX-CF-017	83	C16:0; C18:1; C18:0	_	_	W44 (18-26); W48 (18-30)	Miliacin	_	C29; C30tr?	_	_	-25.7505	-26.1913	-0.44075	W40 (16-24); W42 (16-26); W44 (16-28); W46 (16-30); W48 (16-32); A24; A26; A28; A30; A32; a23; a25; a27; a29; a31	Animal fat (ruminant adipose); millet; plantwax; beeswax; bacterian fermentation product
Rampart area, Champ Fossé, phase III, before reinforcement of rampart	Sector A, Fait 031-002		low/medium form (bowl, 34200)	A-031-001-010	VIX-CF-008	219	C16:0; C17:0; C18:1; C18:0; C20:0; C22:0; C24:0	_	_	A16; A18; A20; A22	Miliacin	_	_	_	_	-28.6035	-26.407	2.1965	W40 (16-24); W42 (16-26); W44 (16-28); W46 (16-30); A24; A26; A28; A30; A32; a23; a25; a27; a29	Animal fat? (porcine); millet; beeswax?
	Sector A, Fait 031-001		low form (bowl, 11200)	A-031-001-010	VIX-CF-007	1105	C16:0;C18:1; C18:0; C20:0; C22:0; C24:0; C26:0; C28:0	_	_	W42 (20-22); W44 (20-24); A16; A18; A20; A22	Miliacin	_	C29; C30; C31tr; C32tr; C33tr	_		_	_	_	W40 (16-24); W42 (16-26); W44 (16-28); W46 (16-30); W48 (16-32); A24; A26; A28; A30; A32; A34; a21; a23; a25; a27; a29; a31	Millet; plantwax; beeswax; bacterian fermentation product
	Sector A, Fait 031-003		low form (bowl, 11200)	A-031-001-010	VIX-CF-009	192	C16:0; C18:1; C18:0; C22:0; C24:0	_	_	A18; A20	Miliacin (tr)	Lupa-2,20(29)-diene, α-betuline I, lupa-2,20(29)-dien-28-ol, allobetul-2-ene, lupenone, lupeol, erythrodiol, betulone, betuline, betulinic acid, allobetuline	_	_	_	_	_	_	W40 (16-24); W42 (16-26); W44 (16-28); A24; A26; A28; A30; A32; a21; a23; a25; a27; a29	Fat?; beeswax?; birch bark tar; millet
	Sector A, Fait 031-004		low/medium form (bowl, 34300)	A-031-001-010	VIX-CF-010	4484	C16:0; C18;0	_	_	W38 (14-24); W42 (18-24), W46 (18-28); 50 (18-32)	Miliacin	_	C30; C32tr	_	52; 50; 48; 44; 42	-26.7182	-29.8313	-3.113	W40 (16-24); W42 (16-26); W44 (16-28); W46 (16-30); W48 (16-32); A24; A26; A28; A30; A32; a21; a23; a25; a27; a29; a31	Animal fat (dairy); plantwax; beeswax; millet; bacterian fermentation product
	Sector AB, Fait 040-001		low/medium form (bowl, 24000)	AB-040-001-007	VIX-CF-016	424	C16:0; C17:0; C18:1; C18:0; C20:0; C22:0; C24:0	_	_	W42(20-22); W44(20-24) ; A18; A20, A22	Miliacin	_	_	_	_	_	_	_	W40 (16-24); W42 (16-26); W44 (16-28); W46 (16-30); W48 (16-32); A24; A26; A28; A30; A32; A34; a21; a23; a25; a27; a29; a31	Millet; plantwax; beeswax
	Sector AB, Fait 040-001		low/medium form (bowl, 33100?)	AB-040-001-003	VIX-CF-026	< 5	C16:0; C18;0	_	_	_	_	_	_	Succinic; fumaric; malic and tartaric (tr) acids	_	_	_	_	_	Grape product/wine?
	Sector D, Fait 170-001	Handmade, semi-fine to coarse ceramic	high form (bottle/jar, 73000)	D-170-001-007	VIX-CF-012	2192	C16:0; C:18:2; C18:1; C18:0; C24:0; C26:0; C28:0	C16/C18 ≥ 1,5; C18:1≥C18:0; C18:2	_	W42(20-22); W44(20-24); W46 (20-26)	_	_	_	_	_	_	_	_	W40 (16-24); W42 (16-26); W44 (16-28); W46 (16-30); W48 (16-32); A24; A26; A28; A30; A32; A34; a21; a23; a25; a27; a29; a31	Plant oil; plantwax; beeswax
	Sector C, Fait 041-001 (Layer 41,1)		high form (bottle/jar, 70000)	C-041-001-001	VIX-CF-019	< 5	_	_	_	_	Miliacin	_	_	_	_	_	_	_	_	Millet
	Sector GH, Fait 140-002		undetermined form (5-70000? pot bottom)	GH-140-002-007	VIX-CF-011	< 5	C16:0; C18:1; C18:0	_	_	_	Miliacin (tr)	_	_	_	_	_	_	_	_	Millet?
Rampart area, Champ Fossé, undetermined phase, pit filling	Sector F, Fait 048-041	Handmade, semi-fine to coarse ceramic	high form (pot, 41000)	F-048-041-001	VIX-CF-021	164	_	_	_	_	Miliacin	_	_	_	_	_	_	_	W40 (16-24); W42 (16-26); W44 (16-28); A24; A26; A28; A30; a21; a23; a25; a27; a29; a31	Millet; wax
	Sector F, Fait 048-028		high form (pot, 51000)	F-048-028-001	VIX-CF-028	18072	C16:0; C18;0	_	_	W34 (16-18; W36 (16-20); 38 (18-20); W(18-370)	_	_	_	Succinic; fumaric; malic and acids	_	-26.561	-25.7042	0.85675	_	Animal fat (porcine); plantwax; fruit products?
